# Supplementary material for: In Vivo 3T Magnetic Resonance Imaging Using a Biologically Specific Contrast Agent for Prostate Cancer: A Nude Mouse Model
Source: Hindawi journal article supplement (doi:10.1155/2017/8424686), 2017-01-01
Supplement: f1 [file 8424686.f1.pdf]

# 1 Supplementary Data

2 TABLE S1. T<sub>2</sub> relaxation times (in ms) obtained for tumours at different time points and treatments.

| Injection   | Before | After | 10min | 20min | 30min | 40min | 24hrs | 48hrs | 72hrs |
|-------------|--------|-------|-------|-------|-------|-------|-------|-------|-------|
| MIC6        | 53     | 46    | 45    | 47    | 46    | 44    | 52    | 57    | 50    |
| MIC6        | 76     | 71    | 63    | 68    | 69    | 68    | 63    | 58    | 58    |
| MIC6        | 48     | 52    | 54    | 51    | 49    | 52    | 46    | 64    | 54    |
| MIC6        | 57     | 55    | 53    | 54    | 59    | 56    | 45    | 39    | 36    |
| MIC6        | 46     | 43    | 41    | 43    | 41    | 42    | 58    | 56    | 49    |
| MIC6        | 79     | 76    | 85    | 79    | 75    | 87    | 52    | 58    | 54    |
| MIC6        | 78     | 73    | 69    | 73    | 71    | 81    | 77    | 71    | 74    |
| MIC6        | 64     | 67    | 68    | 63    | 67    | 69    | 55    | 57    | 59    |
| muJ591:MIC6 | 53     | 49    | 57    | 55    | 55    | 52    | 55    | 60    | 57    |
| muJ591:MIC6 | 54     | 51    | 47    | 48    | 42    | 42    | 62    | 66    | 51    |
| muJ591:MIC6 | 68     | 60    | 54    | 53    | 47    | 46    | 66    | 69    | 51    |
| muJ591:MIC6 | 53     | 53    | 52    | 52    | 57    | 56    | 57    | 58    | 55    |
| muJ591:MIC6 | 52     | 51    | 50    | 50    | 51    | 51    | 46    | --    | --    |
| muJ591:MIC6 | 54     | 47    | 42    | 40    | 39    | 39    | 59    | 71    | 70    |
| muJ591:MIC6 | 61     | 41    | 41    | 38    | 23    | 23    | 51    | 50    | 54    |
| muJ591:MIC6 | 46     | 45    | 47    | 46    | 46    | 46    | 44    | 53    | 49    |
| muJ591:MIC6 | 57     | 56    | 56    | 60    | 59    | 58    | 60    | 58    | 53    |
| muJ591:MIC6 | 48     | 48    | 46    | 46    | 45    | 44    | 52    | 44    | 46    |
| muJ591:MIC6 | 54     | 58    | 56    | 55    | 54    | 55    | 54    | 55    | 54    |
| PBS         | 79     | 76    | 73    | 79    | 77    | 77    | 79    | 67    | 88    |
| PBS         | 53     | 58    | 58    | 60    | 58    | 58    | 61    | 53    | 58    |
| PBS         | 54     | 54    | 54    | 57    | 56    | 56    | 48    | 53    | 51    |

3

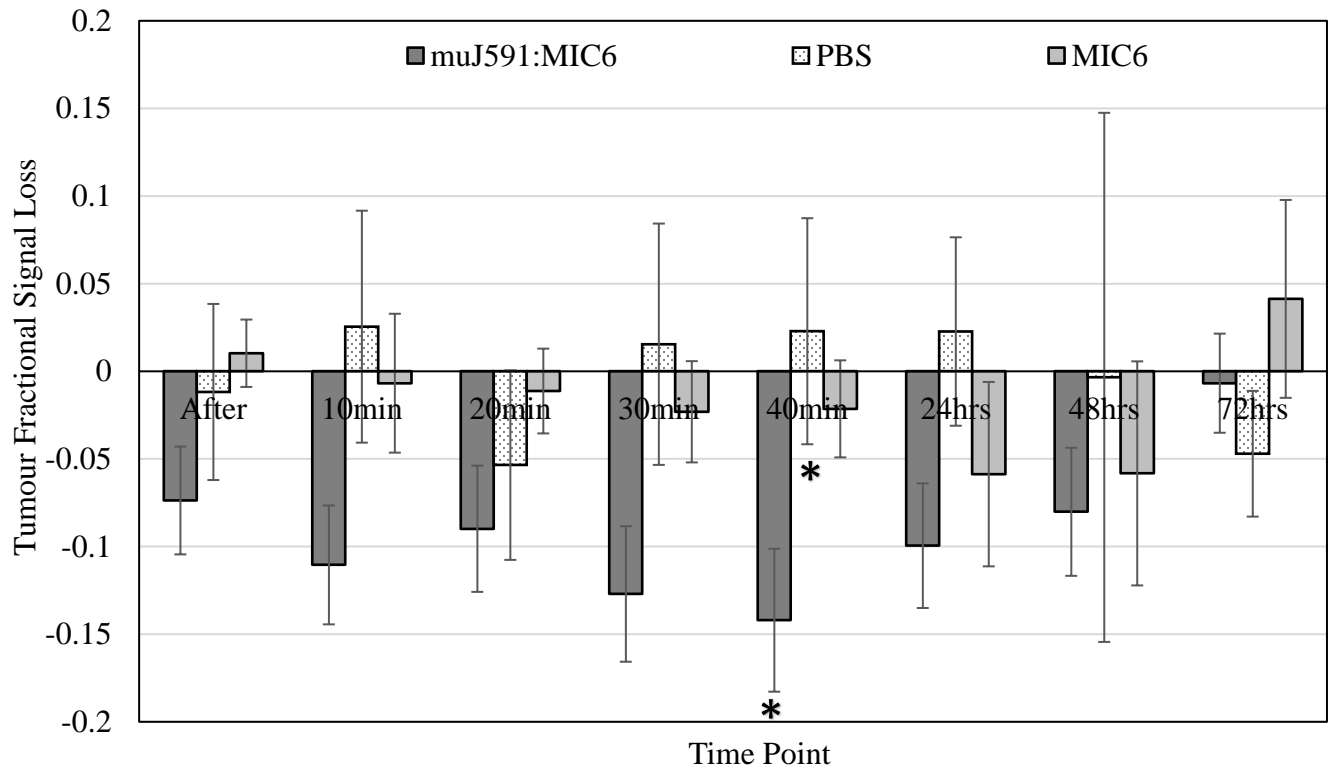

4

5 FIGURE S1. Tumour Fractional Signal Loss Change. The fractional mean signal intensity loss as defined  
 6 by  $(A-B)/B$  where A is the mean signal intensity at each time point and B is the mean signal intensity  
 7 before injection over the same ROI. (\* indicates a significant difference in the tumour mean signal  
 8 intensity ratio between muJ591:MIC6 and PBS at 40 min after injection,  $p=0.05$ ) (Seq. C, TE = 8 ms).
